# Supplementary material
Source: publisher figshare collection journal article supplement (https://gsajournals.figshare.com/ndownloader/files/25259921)
Supplement: Supplementary file 1 [file 25259921]

## Sheet: GWAS summary statistics
Phenotype	Consortia	Quantitative or qualitative trait	Total sample size	Number of cases (affected)	Number of controls(unaffected)	Year of the publication	Publication URL	Title of the publication	First or last author	Data access	Download URL	File name
Alzheimer disorder	IGAP	Case/control trait		17008	37154	2013	https://www.ncbi.nlm.nih.gov/pubmed/24162737	Meta-analysis of 74,046 individuals identifies 11 new susceptibility loci for Alzheimer's disease	Lambert JC	Publicly available	http://web.pasteur-lille.fr/en/recherche/u744/igap/igap_download.php	IGAP_summary_statistics.zip
Alzheimer's Disease	PGC	Case/control trait		71880	383378	2018	https://www.biorxiv.org/content/early/2018/02/22/258533	Genetic meta-analysis identifies 9 novel loci and functional pathways for Alzheimers disease risk	Iris Jansen, Danielle Posthuma	Publicly available	https://ctg.cncr.nl/software/summary_statistics	AD_sumstats_Jansenetal.txt.gz
Amyotrophic Lateral Sclerosis	ProjectMinE	Case/control trait		12577	23475	2016	https://www.nature.com/articles/ng.3622	Genome-wide association analyses identify new risk variants and the genetic architecture of amyotrophic lateral sclerosis	van Rheenen	Publicly available	http://databrowser.projectmine.com	Iris
Bipolar Disorder	PGC	Case/control trait		20352	31358	2019	https://www.nature.com/articles/s41588-019-0397-8	Genome-wide association study identifies 30 loci associated with bipolar disorder	Eli Stahl	Publicly available	https://www.med.unc.edu/pgc/results-and-downloads	daner_PGC_BIP32b_mds7a_0416a.gz
Body Mass Index	GIANT	Quantitative trait	339224			2015	https://www.nature.com/articles/nature14177	Genetic studies of body mass index yield new insights for obesity biology	Adam E. Locke	Publicly available	http://portals.broadinstitute.org/collaboration/giant/index.php/GIANT_consortium_data_files	SNP_gwas_mc_merge_nogc.tbl.uniq.gz
Coronary artery disease	CARDIOGRAM	Case/control trait		60801	123504	2015	https://www.nature.com/ng/journal/v47/n10/full/ng.3396.html	A comprehensive 1000 Genomes–based genome-wide association meta-analysis of coronary artery disease	Majid Nikpay	Publicly available	http://www.cardiogramplusc4d.org/data-downloads/	cad.add.160614.website.txt.gz
Crohn's disease	IIBDGC	Case/control trait		12194	34915	2017	https://www.ncbi.nlm.nih.gov/pubmed/28067908	Genome-wide association study implicates immune activation of multiple integrin genes in inflammatory bowel disease	de Lange KM	Publicly available	ftp://ftp.sanger.ac.uk/pub/project/humgen/summary_statistics/human/2016-11-07/	cd_build37_40266_20161107.txt.gz
Educational attainment	SSGAC	Quantitative trait	766345			2018	https://www.nature.com/articles/s41588-018-0147-3.epdf	Gene discovery and polygenic prediction from a 1.1-million-person GWAS of educational attainment	Lee et al	Publicly available	https://www.thessgac.org/data	GWAS_EA_excl23andMe.txt.gz
Height	GIANT	Quantitative trait	253288			2014	http://www.nature.com/ng/journal/v46/n11/full/ng.3097.html	Defining the role of common variation in the genomic and biological architecture of adult human height	Andrew R Wood	Publicly available	http://portals.broadinstitute.org/collaboration/giant/index.php/GIANT_consortium_data_files	GIANT_HEIGHT_Wood_et_al_2014_publicrelease_HapMapCeuFreq.txt.gz
Height	GIANT	Quantitative trait	133653			2010	https://www.ncbi.nlm.nih.gov/pmc/articles/PMC2955183/	Hundreds of variants clustered in genomic loci and biological pathways affect human height	Lango Allen H	Publicly available	http://portals.broadinstitute.org/collaboration/giant/images/4/49/GIANT_HEIGHT_LangoAllen2010_publicrelease_HapMapCeuFreq.txt.gz	GIANT_HEIGHT_LangoAllen2010_publicrelease_HapMapCeuFreq.txt.gz
Height	GIANT	Quantitative trait	709706			2018	https://www.biorxiv.org/content/early/2018/03/02/274654	Meta-analysis of genome-wide association studies for height and body mass index in ~700,000 individuals of European ancestry	Loic Yengo	Publicly available	https://portals.broadinstitute.org/collaboration/giant/index.php/GIANT_consortium_data_files	Meta-analysis_Wood_et_al%2BUKBiobank_2018.txt.gz
High-density lipids	LIPIDS	Quantitative trait	188577			2013	http://www.nature.com/ng/journal/v45/n11/full/ng.2797.html	Discovery and refinement of loci associated with lipid levels	Cristen J Willer	Publicly available	http://csg.sph.umich.edu/abecasis/public/lipids2013/	jointGwasMc_HDL.txt.gz
Intelligence	CTG	Quantitative trait	269206			2018	https://www.nature.com/articles/s41588-018-0152-6	Genome-wide association meta-analysis in 269,867 individuals identifies new genetic and functional links to intelligence	J. E. Savage	Through collaboration	https://ctg.cncr.nl/software/summary_statistics	iq_metaanalysis_noTOP.out.gz
Low-density lipids	LIPIDS	Quantitative trait	188577			2013	http://www.nature.com/ng/journal/v45/n11/full/ng.2797.html	Discovery and refinement of loci associated with lipid levels	Cristen J Willer	Publicly available	http://csg.sph.umich.edu/abecasis/public/lipids2013/	jointGwasMc_LDL.txt.gz
Putamen volume	ENIGMA	Quantitative trait	11598			2016	https://www.nature.com/nature/journal/v520/n7546/full/nature14101.html	Common genetic variants influence human subcortical brain structures	Derrek P. Hibar	Through collaboration	http://enigma.ini.usc.edu/research/download-enigma-gwas-results/	ENIGMA_SE_noGC_Mput_Jun26_1.final.gz
Schizophrenia	PGC	Case/control trait		35476	46839	2014	http://www.nature.com/nature/journal/v511/n7510/full/nature13595.html	Biological insights from 108 schizophrenia-associated genetic loci	S Ripke	Publicly available	https://www.med.unc.edu/pgc/results-and-downloads	scz2.snp.results.txt.gz
Total Cholesterol	LIPIDS	Quantitative trait	188577			2013	http://www.nature.com/ng/journal/v45/n11/full/ng.2797.html	Discovery and refinement of loci associated with lipid levels	Cristen J Willer	Publicly available	http://csg.sph.umich.edu/abecasis/public/lipids2013/	jointGwasMc_TC.txt.gz
Ulcerative Colitis	IIBDGC	Case/control trait		12366	34915	2017	https://www.ncbi.nlm.nih.gov/pubmed/28067908	Genome-wide association study implicates immune activation of multiple integrin genes in inflammatory bowel disease	de Lange KM	Publicly available	ftp://ftp.sanger.ac.uk/pub/project/humgen/summary_statistics/human/2016-11-07/	uc_build37_45975_20161107.txt.gz
Years of Educational Attainment	SSGAC	Quantitative trait	328917			2016	http://www.nature.com/nature/journal/vaop/ncurrent/full/nature17671.html	Genome-wide association study identifies 74 loci associated with educational attainment	Okbay	Publicly available	https://www.thessgac.org/data	EduYears_Main.txt.gz
